# Supplementary material for: Un cànon dietarístic?: els avantars d'una enquesta
Source: Royal Society of Chemistry journal article supplement (doi:10.1039/d3nr00439b), 2008-01-01
Supplement: d3nr00439b1.pdf [file d3nr00439b1.pdf]

## Supporting Information

### Operando surface optical nanometrology reveals diazonium salts visible photografting mechanism

Baptiste Maillot, Madelyn Johnson, Jean-Frédéric Audibert, Fabien Miomandre, Vitor Brasiliense\*

#### S1 ) Evolution of the grafted layer optical thickness

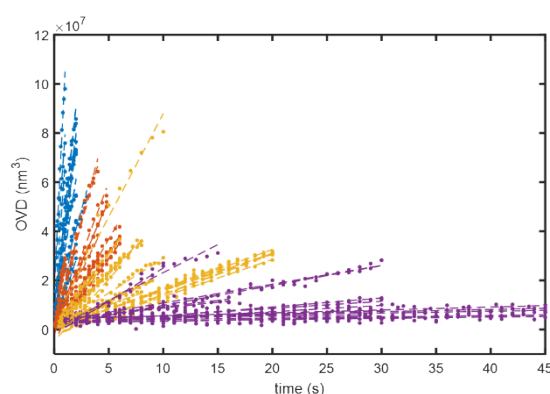

**Figure S1.** Evolution of the OVD as a function of time for several concentrations (0.625-20 mM and excitation power – corresponding to the same data shown in Figure 1). The colors indicate curves the power used (blue :200  $\mu$ W, orange: 50  $\mu$ W, yellow: 12.5  $\mu$ W , purple: 3.12  $\mu$ W).

#### S2) Evaluation of the diffusional limit for a disk grafting zone

Diffusive transport towards a disk shaped zone (defined as the laser waist on the surface), leads to a concentration profile described in cylindrical coordinates  $(r,z)$  as the solution to the following PDE:

$$\frac{\partial C(r,z,t)}{\partial t} = D \left[ \frac{\partial^2 C(r,z,t)}{\partial r^2} + \frac{1}{r} \frac{\partial C(r,z,t)}{\partial r} + \frac{\partial^2 C(r,z,t)}{\partial z^2} \right]$$

The diffusive limit is established when the reaction rate is much faster than diffusive transport, which leads to the following boundary conditions:

$$C = C_{bulk} \text{ at } t = 0, \text{ and at the limits } r \rightarrow \infty \text{ and } z \rightarrow \infty$$

$$\begin{aligned} C &= 0 \text{ at } z = 0, r < r_0, t > 0 \\ \frac{\partial C}{\partial z} &= 0 \text{ at } z = 0, r > r_0, t > 0 \end{aligned}$$

The problem is strictly analogous to the determination of the steady state current at a disk microelectrode, and has been described in detail in [1]. The steady state flux of reactant is obtained from :

$$\varphi(t) = 4r_0 D C_{bulk} f\left(\frac{4Dt}{r_0^2}\right) (= i_{ss}/nF)$$

In which  $D$  is the grafting species diffusion coefficient,  $C_{\text{bulk}}$  its bulk concentration,  $r_0$  the species sink region.  $I_{\text{ss}}$ ,  $n$   $F$  are respectively the electrochemical steady state current, number of exchanged electrons per molecule and Faraday constant in the electrochemical analogue problem.  $f(\tau)$  is a numerical term which depends on the time since establishment of the flux, and that can be approximated for  $\tau = 4Dt/r_0^2 > 1$  as:<sup>1,2</sup>

$$f(\tau) \cong 1 + 0.71835\tau^{-\frac{1}{2}} + 0.05626\tau^{-\frac{3}{2}} + 0.00646\tau^{-\frac{5}{2}} + \dots$$

Which quickly converges to 1 (within 1%) after  $\tau = 5$ , or  $t = 5$  ms ( $D = 10^{-9} \text{ m}^2/\text{s}$ ,  $r_0 = 1 \mu\text{m}$ ). Therefore, taking  $C_{\text{bulk}} = 5$  mM,  $D = 10^{-9} \text{ m}^2/\text{s}$ , and  $r_0 = 1 \mu\text{m}$ , a maximal expected flux of  $2 \times 10^{-14} \text{ mol/s}$  is estimated, as stated in the main text.

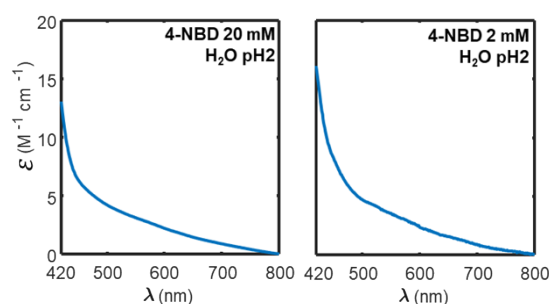

### S3) UV-Vis Absorption Spectra

**Figure S2.** Comparison between the UV/Vis absorption spectra for 2 mM and 20 mM 4-NBD solutions (solvent :  $\text{H}_2\text{O}$  pH2, HCl), showing no evidence of complexation or  $\pi$ - $\pi$  stacking.

### S4) Grafting rate wavelength dependency for

**Diazonium salt synthesis** Following the classical diazotization procedure (detailed in the methods section), a 5 mM diazonium aqueous solution (pH2, HCl) was prepared from its aniline precursor (toluidine). The grafting rate was evaluated at different wavelengths using the same procedure as described for 4NBD in the main text. As it can be seen in the Figure S3, the presence of a small peak in the visible range anticipates the onset of the grafting

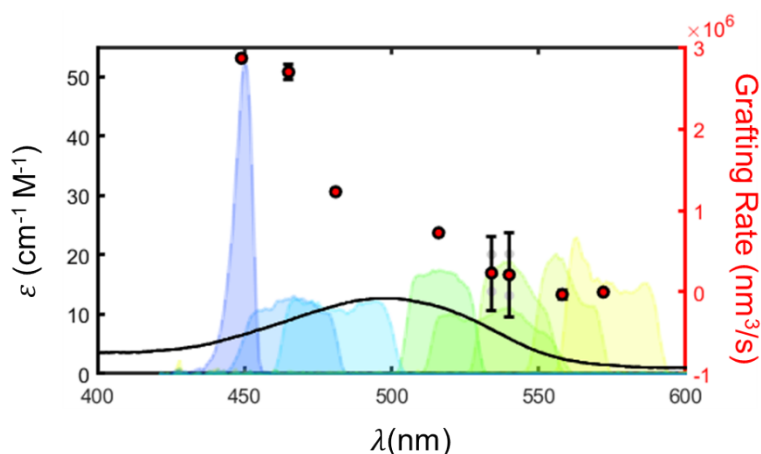

reaction, which can be evaluated for wavelengths as high as 540 nm.

**Figure S3.** Action plot comparing the absorption spectra, and the grafting rate of p-toluidine-diazonium salt as a function of the excitation wavelength (5mM in pH2 HCl aqueous solvent). The background spectra represent the normalized excitation spectra and error bars represent  $3\sigma$  errors for the mean value.

### S5) Expected proportionality between temperature and refractive index increase

We evaluate the expected  $\Delta T$  leading to a  $\Delta n$  of 1 nm (SNR = 1) at  $\lambda = 633$  nm, using experimental  $dn/dT$  expression described eq. 2, valid for the range 270K to 350K:<sup>3</sup>

$$\frac{dn}{dT} = -B \left[ 1 - \exp \left( -\frac{T - T_0}{T_k} \right) \right]$$

Where  $B = 26.2 \times 10^{-5} K^{-1}$ ,  $T_0 = 2^\circ C$  and  $T_k = 48.5^\circ C$ , which leads to  $dn/dT = -(1.1 \pm 0.3) \times 10^{-4} K^{-1}$ . The expected refractive index change is thus evaluated, assuming that only region within an Rayleigh distance

(estimated from the beam waist  $\omega_0$  as  $L_R = \frac{\pi \omega_0^2}{\lambda}$ ) from the focal plane influences our measurement:

$$OPD = \Delta n \times L_R = \frac{dn}{dT} \times \Delta T \times L_R \Rightarrow \Delta T = OPD / \left( \frac{dn}{dT} \times L_R \right)$$

Therefore the minimal measurable OPD (corresponding to SNR =1), would be obtained for a  $\Delta T$  of  $1 \pm 0.2^\circ C$  at room temperature, as illustrated in Figure S4, leading to the estimation given in the main text.

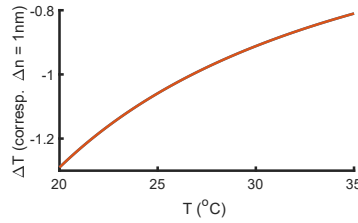

**Figure S4.** Temperature difference expected to lead to a phase difference of 1 nm.

### S6) Degradation analysis in the presence of DMSO

In order to better understand the deactivation behavior observed in the presence of DMSO, we perform a series of bulk irradiation experiments, monitored through the  $H^1$  NMR spectra. The products were formed by directly illuminating the NMR tube with UV lamp (Hamamatsu LC8) at maximal power for 5 minutes. In Figure S5 we compare the  $H^1$  NMR spectra before and after illumination in the presence and absence of d6-DMSO. The resulting spectra are recalibrated using residual DMSO as a reference at 2.3 ppm.

Before irradiation, the  $^1\text{H}$  NMR reveals, as expected, a relatively simple feature, corresponding to the two characteristic doublets of 4-nitrobenzenediazonium ( $\delta$  8.44 and 8.55,  $J = 9.2\text{Hz}$  in  $\text{d}_6\text{-DMSO}/\text{D}_2\text{O}$  1:1 mixture,  $\delta$  8.58 and 8.75,  $J = 9.2\text{Hz}$  in  $\text{D}_2\text{O}$ ). Irradiation of the solution in deuterated water (Fig S5B), only leads to minor modification of the spectra, with the apparition of trace-level degradation product ( $\delta$  8.03 and 6.83,  $J = 9.2\text{Hz}$ ). When the experiment is carried out in the presence of  $\text{d}_6\text{-DMSO}$ , several new peaks appear, which we attribute to three distinct products generated by a chain of reactions initiated by irradiation, as indicated in the figure. Considering the relatively simple medium, the radical species potentially present, and the structure of the signal, we tentatively assign the spectra as follows: (in blue) (i) p-substituted dinitro-azobenzene, resulting from the attack of a pristine diazonium ion by a radical the presence of azobenzene is also supported by its distinctive yellow color. (in orange) (ii) p  $\text{d}_5\text{-DMSO}$ -substituted nitrobenzene, resulting from interaction between nitrobenzene radical and  $\text{d}_5\text{-DMSO}$  radicals resulting from D-atom abstraction (iii) (in yellow) (iii) p-deuterated nitrobenzene, formed by abstraction of a D atom from  $\text{d}_6\text{DMSO}$  by a phenyl radical, in agreement with the

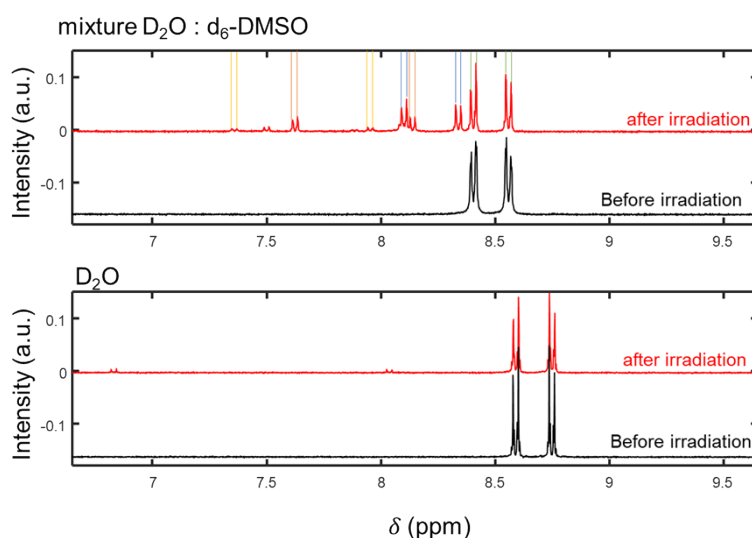

chemical shift observed for the ortho and meta protons of nitrobenzene (not shown).

**Figure S5.**  $^1\text{H}$  NMR spectra of 4-NBD in different solvents, before and after irradiation, in either a 1:1 mixture of (A)  $\text{D}_2\text{O}:\text{d}_6\text{-DMSO}$  or (B)  $\text{D}_2\text{O}$ , putting in evidence the formation of several products when irradiation is carried out in the presence of DMSO.

#### References :

- 1 A. J. Bard and L. R. Faulkner, *Electrochemical Methods: Fundamentals and Applications*, 2nd Edition, Wiley Textbooks, 2000.
- 2 K. Aoki, K. Akimoto, K. Tokuda, H. Matsuda and J. Osteryoung, *Linear sweep voltammetry at very small stationary disk electrodes*, Elsevier Sequoia S.A, 1984, vol. 3.
- 3 X. Y. Wang, Z. S. Zhu, Y. K. Lu, G. Abbate, U. Bernini, E. Ragozzino and F. Somma, *The temperature dependence of the refractive index of water*, 1978, vol. 11.
